# Supplementary material for: Synthesis of zeolite SSZ-24 using a catalytic amount of SSZ-13 seeds
Source: Royal Society of Chemistry journal article supplement (doi:10.1039/c9qi00971j), 2019-01-01
Supplement: c9qi00971j1.pdf [file c9qi00971j1.pdf]

1

Supporting information

2

3

**Synthesis of zeolite SSZ-24 using a catalytic amount of SSZ-13 seeds**

4

Lingxue Tang,<sup>a</sup> Kok-Giap Haw,<sup>a</sup> Ping He,<sup>a</sup> Qianrong Fang,<sup>a</sup> Shilun Qiu,<sup>a</sup> Valentin Valtchev<sup>a,b\*</sup>

5

6 <sup>a</sup> State Key Laboratory of Inorganic Synthesis and Preparative Chemistry, Jilin University, Changchun 130012,

7 China

8 <sup>b</sup> Normandie Univ, ENSICAEN, UNICAEN, CNRS, Laboratoire Catalyse et Spectrochimie, 6 Marechal Juin, 14050

9 Caen, France

10

11 E-mail: valentin.valtchev@ensicaen.fr

12

13

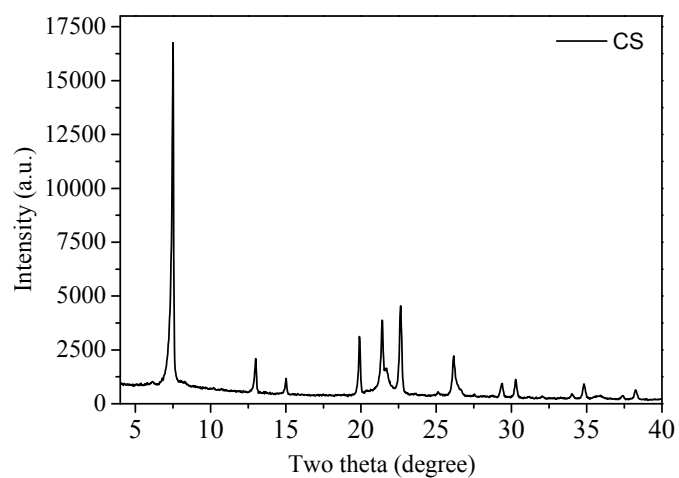

14

**Fig. S1** XRD pattern of reference sample obtained by conventional synthesis (CS).

15

16

17

18

19

20

21

1  
2

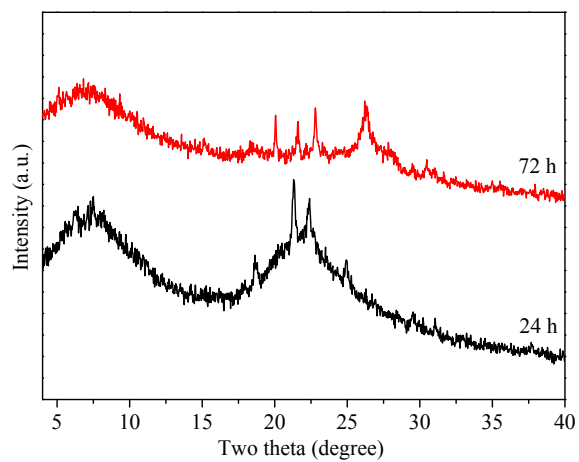

3

4 **Fig. S2** XRD patterns of the samples obtained from the conventional system (0.1TMAD: 0.15KOH: 1SiO<sub>2</sub>: 44H<sub>2</sub>O)  
5 with 5 wt.% SSZ-24 seeds added.

6

7

8

9

10

11

12

13

14

15

16

17

18

19

20

21

22

23

24

25

26

27

28

29

30

1  
2

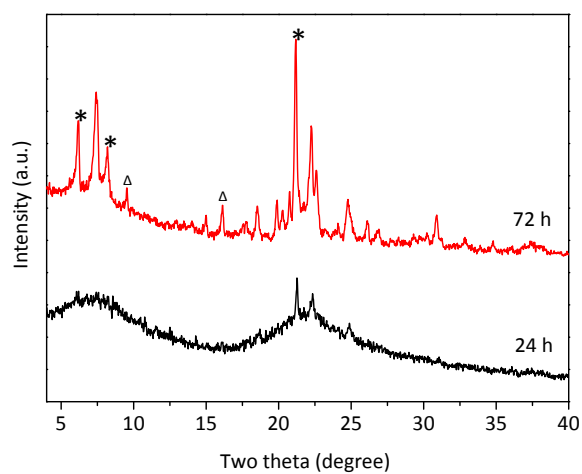

3  
4  
5  
6  
7  
8  
9  
10  
11  
12  
13  
14  
15  
16  
17  
18  
19  
20  
21  
22  
23  
24  
25  
26  
27  
28  
29  
30  
31

**Fig. S3** XRD patterns of the samples prepared in the conventional system (0.1TMAD: 0.15KOH: 1SiO<sub>2</sub>: 44H<sub>2</sub>O) with 5 wt.% SSZ-13 seeds added.

\* Indicates the SSZ-31 XRD peaks: Δ indicates the SSZ-13 XRD peaks.

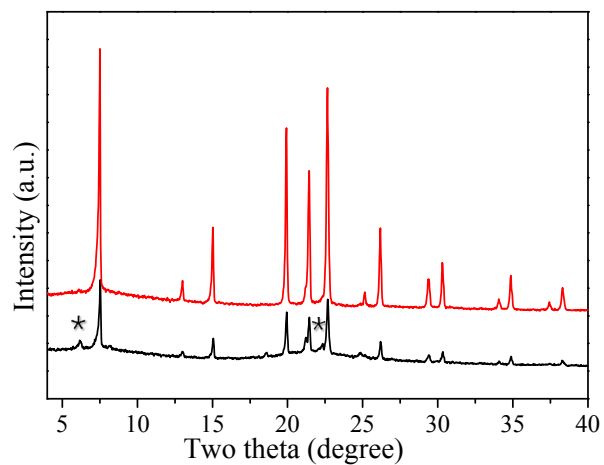

**Fig. S4** XRD patterns of the S24-5 samples synthesized at 180 °C for 22 h after a preliminary aging at 100 °C for 1 h (red pattern) and without a preliminary aging at 100°C (black pattern).

\* Indicates the SSZ-31 XRD peaks.

1  
2  
3  
4  
5  
6  
7  
8  
9  
10  
11  
12  
13  
14  
15  
16  
17  
18  
19  
20  
21  
22

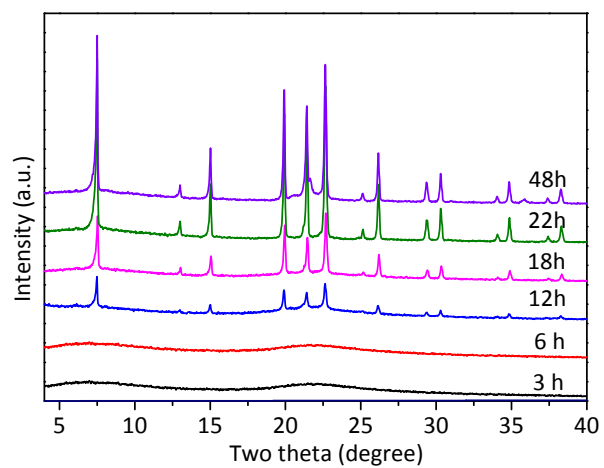

1

2

3 **Fig. S5** XRD patterns of the series of samples S13-18 after 3, 6, 12, 18, 22, and 48 h of hydrothermal synthesis.

4 The peak area at 7.42° 2θ was used for the calculation of the crystallinity with respect to the reference CS sample.

5

6

7

8

9

10

11

12

13

14

15

16

17

18

19

20

21

22

23

24

25

26

27

28

29

1

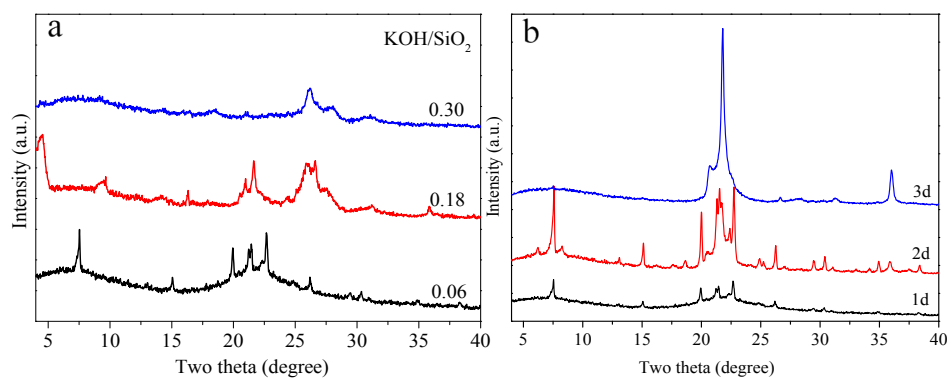

2

3 **Fig. S6** (a) Impact of K<sup>+</sup> content on the crystallization of SSZ-24 at 180°C for 24 h, (b) Impact of the crystallization

4 time on the 0.06 KOH/SiO<sub>2</sub> system.

5

6

7

8

9

10

11

12

13

14

15

16

17

18

19

20

21

22

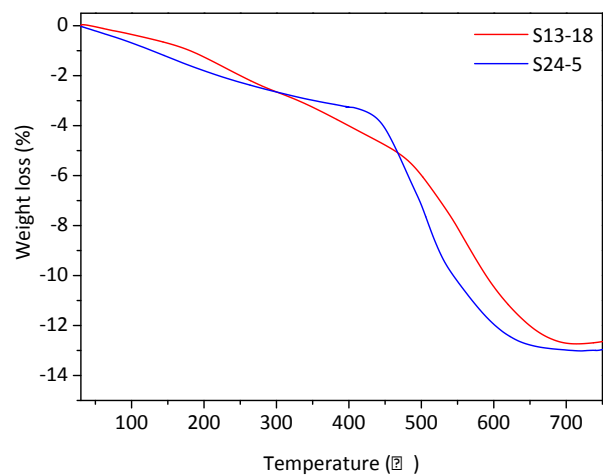

1

2

**Fig. S7** TG profiles of S13-18 and S24-5 samples.

3

4

5

6

7

8

9

10

11

12

13

14

15

16
